# Supplementary material
Source: PubMed Central journal article supplement (PMC6927245)
Supplement: NIHMS1021932-supplement-Supp1.pdf [file NIHMS1021932-supplement-Supp1.pdf]

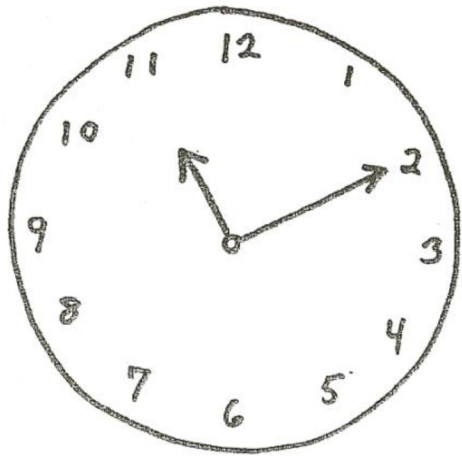

Frailty Score: \_\_\_\_\_ (0-5 scale)

Repeat: \_\_\_\_\_ (0-3 scale)

Recall: \_\_\_\_\_ (0-3 scale)

Dominant Grip Strength R or L

1 \_\_\_\_\_ 2 \_\_\_\_\_ 3 \_\_\_\_\_

Education: \_\_\_\_\_

Repeated Clock Instructions: Y or N
